# Supplementary material
Source: PubMed Central journal article supplement (PMC4271125)
Supplement: supp_kfu127_toxsci-14-0184-File011.pdf [file supp_kfu127_toxsci-14-0184-File011.pdf]

## Supplementary Data

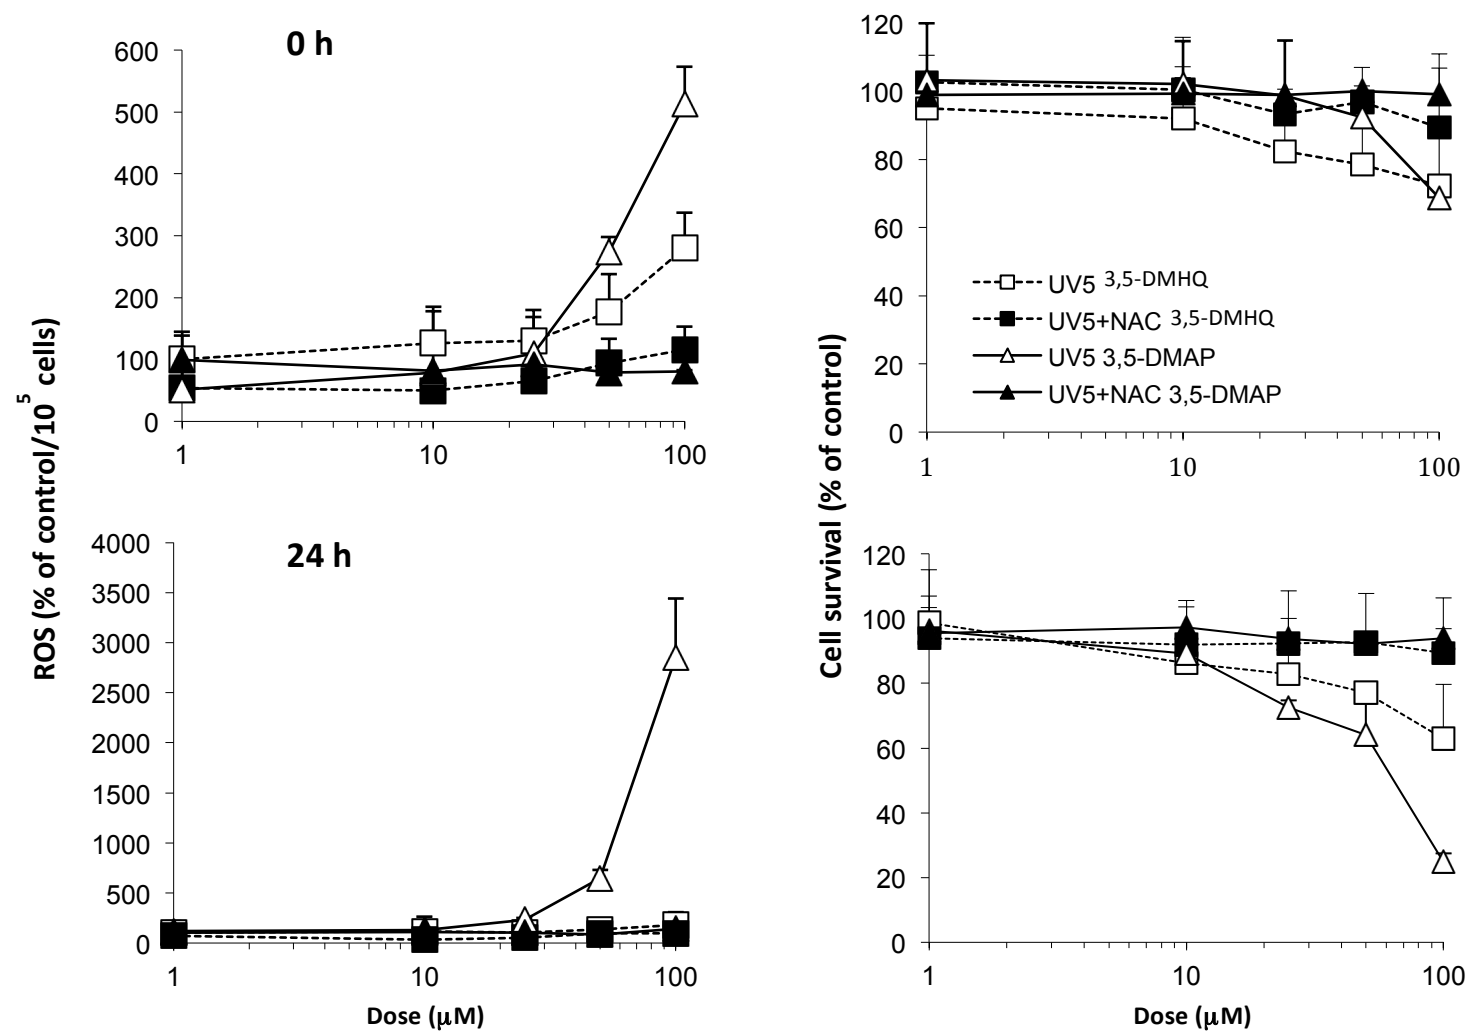

**Figure S1.** Dose-responses of survival and production of ROS at 0 and 24 h after treatment of UV5 cells with 3,5-DMAP and 3,5-DMHQ.

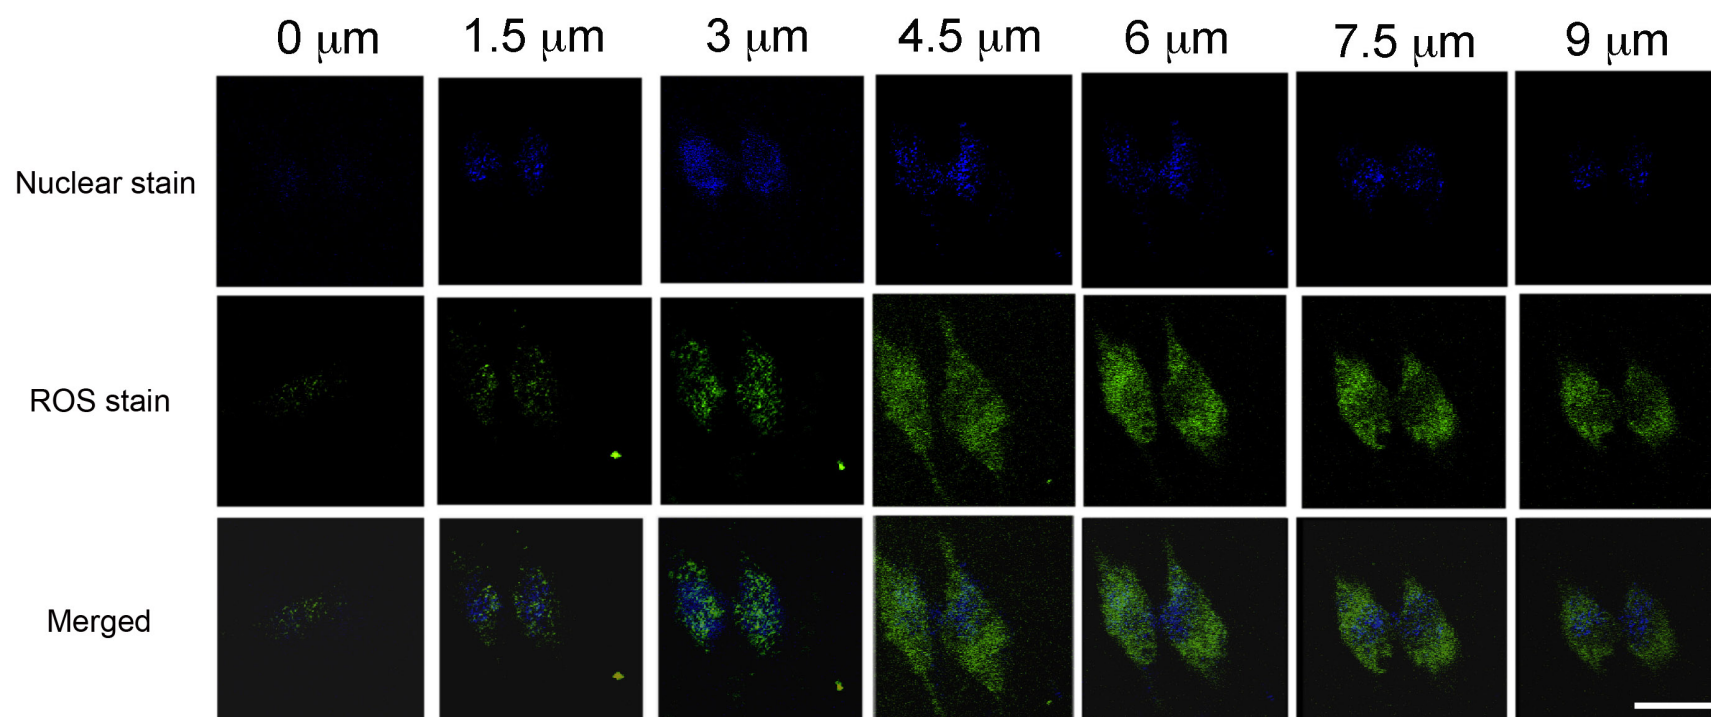

**Figure S2.** Confocal microscopy of two AA8 cells exhibiting extensive ROS staining after treatment with 50  $\mu\text{M}$  3,5-DMAP. This series of images reveals more intense staining in the cytoplasm compared to the nucleus but also shows significant staining in sections that are mostly nuclear (cf. section at 1.5  $\mu\text{m}$ ). Scale bar is 10  $\mu\text{m}$ .

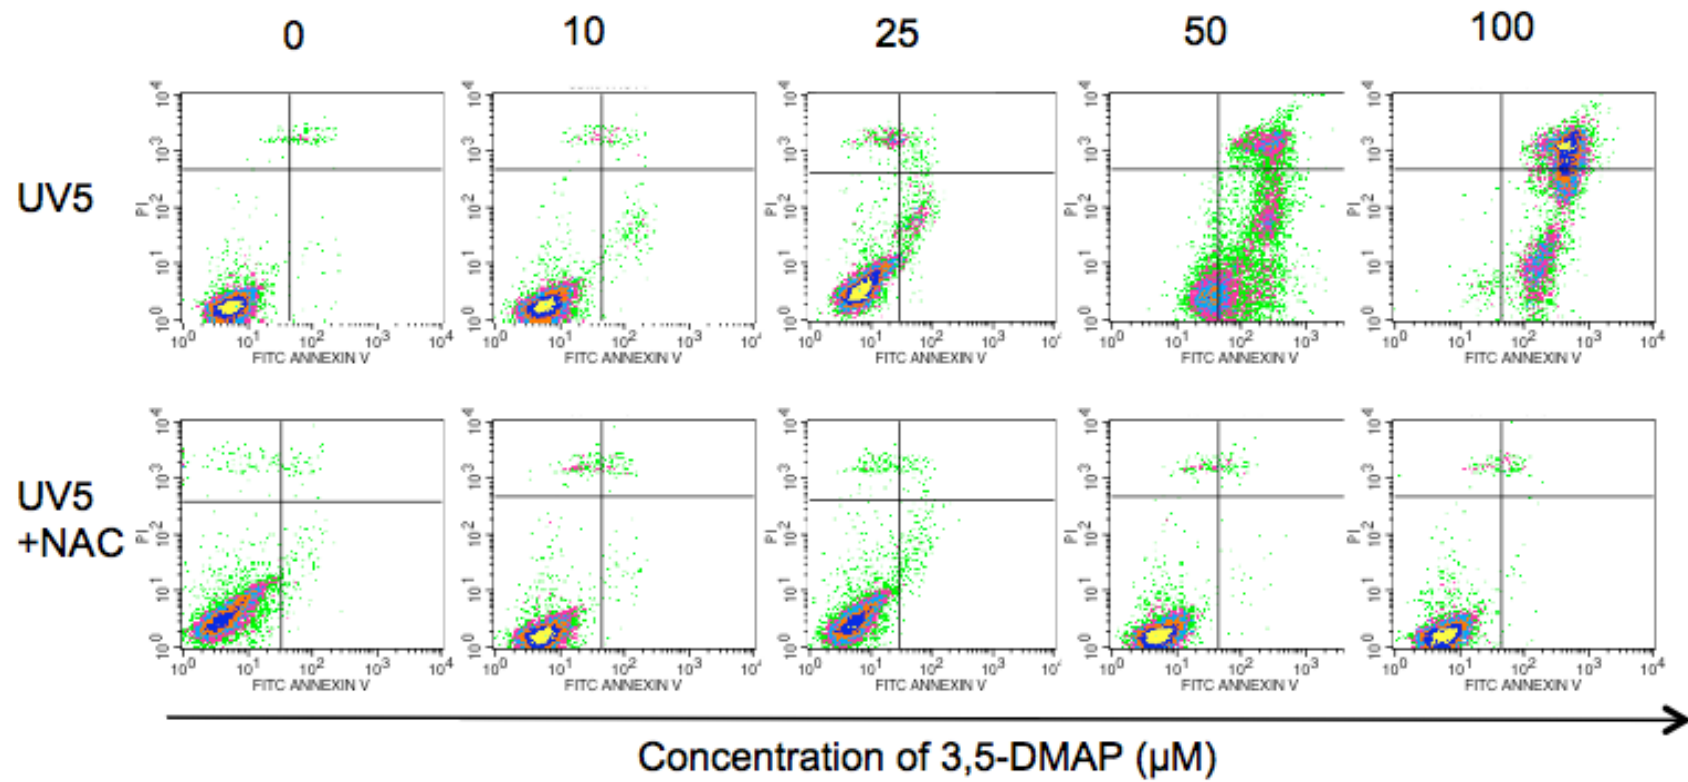

**Figure S3.** Apoptotic cells were identified by flow cytometric analysis of UV5 cells after Annexin V-FITC and PI staining. The analysis of cells treated with 3,5-DMAP (0, 10, 25, 50, and 100  $\mu\text{M}$ )  $\pm$  NAC (5 mM) for 24 h.
